# Supplementary material
Source: publisher site journal article supplement (http://www.kjim.org/upload/media/kjim-2019-098-suppl3.pdf)
Supplement: Supplementary file 1 [file kjim-2019-098-suppl3.pdf]

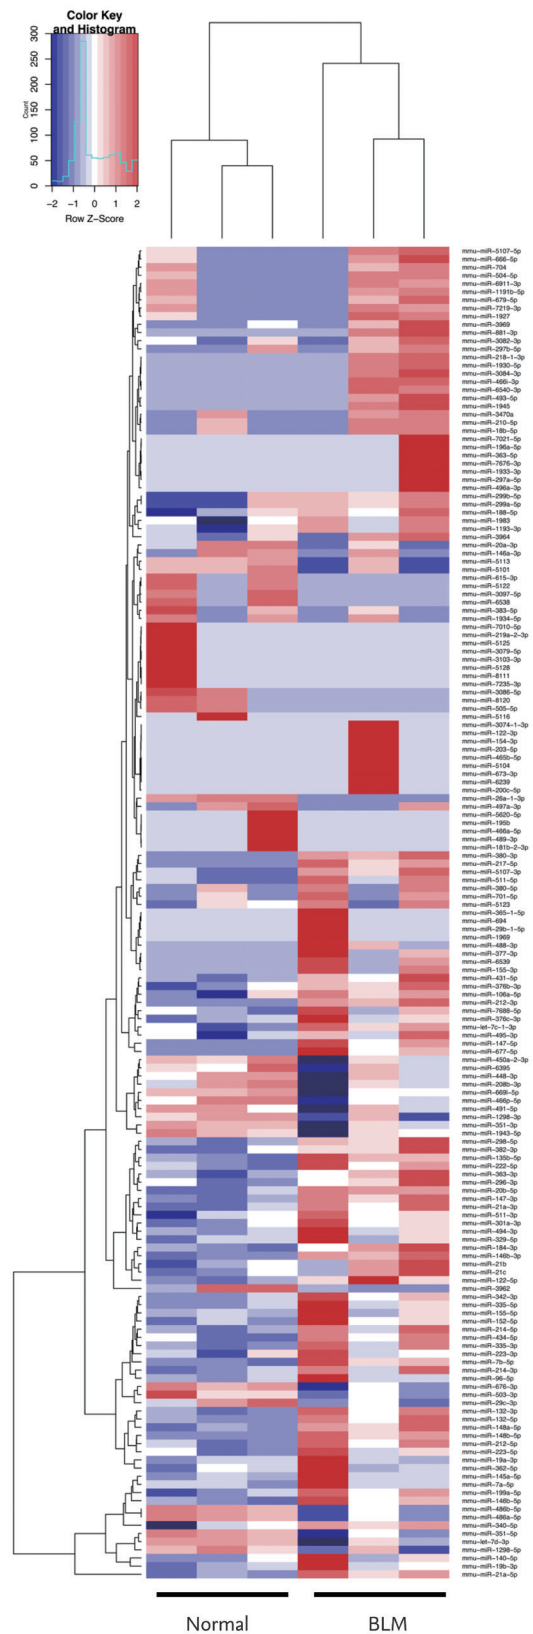

**Supplementary Figure 2.** Clusters of differentially expressed miRNAs (miRNAs) in bleomycin (BLM)-induced lung fibrosis mice comparing with normal ones. There were 621 miRNAs expressed above background. Each row of the heat map represented one of the differentially expressed miRNA gene, and each column represented a sample. Red indicated an increase in miRNA gene expression, whereas blue indicated a decrease. Samples were identified at the bottom. miRNA names were listed to the right.
